# Supplementary material for: Dual control of pcdh8l/PCNS expression and function in Xenopus laevis neural crest cells by adam13/33 via the transcription factors tfap2α and arid3a
Source: eLife. 2017 Aug 22;6:e26898. doi: 10.7554/eLife.26898 (PMC5601995; doi:10.7554/eLife.26898)
Supplement: Figure 1—source data 1. [file elife-26898-fig1-data1.xlsx]

## Sheet: Fig 1 C
	Sumary percentage of embryos with no fluorescent CNC in the migration pathway.
											No. of Embryos for each set
		RFP (Normalized to Zero)	RFP+MO13	RFP+MO13+EC1-4	RFP+MO13+PCNS	RFP+MO13+A13					RFP	RFP+MO13	RFP+MO13+EC1-4	RFP+MO13+PCNS	RFP+MO13+A13			Error NI
	Set 1	0	49	47	43	28					38	30	23	33	34			0.0432
	Set 2	0	65	45	36	25					25	21	25	23	31			0.0654
	Set 3	0	57	54	31	21					36	32	32	25	47			0.0594
	Set 4	0	48	42	38						51	49	26	31				0.0462
	Set 5	0	64	47	31						62	54	26	33				0.0429
	Avg	0	56.6	47	35.8	24.6667				Total Embryos	212	186	132	145	112
		0	8.01873	4.41588	5.06952	3.51188											Avg error oh normailzed NI	0.05142
	Std Error	0.051 (from experimental sets)	3.58608	1.97484	2.26716	1.57056

## Sheet: More repeats with calculation
				RFP	RFP	RFP+ EC 1-4	RFP+ PCNS	RFP+ A13
				0	60.4614	14.5605	17.3072	8.36317
					60.23	34	40	17
					53	28	35	22
				0	63	22	38	25
				0	63	22	38	25
				0	0.604614	0.145605	0.173072	0.0836317
		RFP	RFP+MO13	RFP+MO13+EC1-4	RFP+MO13+PCNS	RFP+MO13+A13
		8.33	63.6363	31.5789	20	20
		16.129	66.6667	35.2941	41.6667	30
		10	64.7059	27	35	24
		12	60.4614	14.5605	17.3072	8.36317
		10	60.23	34	40	17
		14	53	28	35	22
	Avg	11.7432	61.45	28.4056	31.4956	20.2272
	Migration	88.2568	38.55	71.5944	68.5044	79.7728
	Migration Ratio normalized to 1	1.00008	0.436827	0.811268	0.776253	0.903941
	Inhibition	00:00:00	0.563173	0.188732	0.223747	0.0960589
	% (value*100)	0	56.3173	18.8732	22.3747	9.60589
	Std Dev	2.90248	4.82623	7.5186	10.3324	7.26782
	Std. Error	1.18493	1.9703	3.06946	4.2182	2.96708

## Sheet: Repeat 2
			Migrated CNC	Total Embryo Migrated+Non Migrated	Migrated CNC/ Total	Inhibition of migration	%
		RFP+MO13	4	15	0.266667	0.733333	73.3333
		RFP+MO13+EC1-4	9	19	0.473684	0.526316	52.6316
		RFP+MO13+PCNS	6	10	0.6	0.4	40
		RFP+MO13+A13	10	16	0.625	0.375	37.5
		RFP	18	21	0.857143	0.142857	14.2857

## Sheet: Repeat 3
				Migrated CNC	Total Embryo Migrated+Non Migrated	Migrated CNC/ Total	Inhibition of migration	%
			RFP+MO13	6	15	0.4	0.6	60
			RFP+MO13+PCNS	14	19	0.736842	0.263158	26.3158
			RFP+MO13+EC1-4	10	16	0.625	0.375	37.5
			RFP+MO13+A13	12	17	0.705882	0.294118	29.4118
			RFP	16	19	0.842105	0.157895	15.7895

## Sheet: Repeat 4
					Migrated CNC	Total Embryo Migrated+Non Migrated	Migrated CNC/ Total	Inhibition of migration	%
				RFP	13	14	0.928571	0.0714286	7.1
				RFP+MO13	8	22	0.363636	0.636364	63.6363
				RFP+MO13+EC1-4	13	19	0.684211	0.315789	31.5789
				RFP+MO13+PCNS	16	20	0.8	0.2	20
				RFP+MO13+A13	8	10	0.8	0.2	20

## Sheet: Repeat 5
					Migrated CNC	Total Embryo Migrated+Non Migrated	Migrated CNC/ Total	Inhibition of migration	%
				RFP	11	12	0.916667	91.6667	8.33333
				RFP+MO13	5	25	0.2	20	80
				RFP+MO13+EC1-4	7	9	0.777778	77.7778	22.2222
				RFP+MO13+PCNS	16	20	0.8	80	20
				RFP+MO13+A13	14	22	0.636364	63.6364	36.3636

## Sheet: Repeat 7
					Migrated CNC	Total Embryo Migrated+Non Migrated	Migrated CNC/ Total	Inhibition of migration	%	Total Embryo
				RFP	26	31	0.45614	0.54386	54.386	57
				RFP+MO13	8	24	0.25	0.75	75	32
				RFP+MO13+PCNS	11	17	0.392857	0.607143	60.7143	28
				RFP+MO13+EC1-4	14	24	0.368421	0.631579	63.1579	38
				RFP+MO13+A13	14	20	0.411765	0.588235	58.8235	34
