# Supplementary material for: Dual control of pcdh8l/PCNS expression and function in Xenopus laevis neural crest cells by adam13/33 via the transcription factors tfap2α and arid3a
Source: eLife. 2017 Aug 22;6:e26898. doi: 10.7554/eLife.26898 (PMC5601995; doi:10.7554/eLife.26898)
Supplement: Figure 2—figure supplement 1—source data 1. [file elife-26898-fig2-figsupp1-data1.xlsx]

## Sheet: Fig 2 supp a
						NI	MO13		NI Error
					Set 1	1	0.625603		0.0501
					Set 2	1	0.5834		0.067
					Set 3	1	0.694		0.075
					Avg	1	0.634334	Avg error NI	0.0640333
							0.0558146
					Error	0.0640333	0.0322246
					Calculations	GAPDH cT	PCNS cT	∆cT	∆∆cT ( Refrence dct lowest value)	Power	Avg	Group power Avg/NI Avg power	Avg	SD	SEM
					NI	20.23	31.24	11.01	0.24	0.846745	0.911863	0.928589	1	0.0868313	0.0501321
						20.06	31	10.94	0.17	0.888843		0.974755
						20.05	30.82	10.77	0	1		1.09666
					MO13	19.46	31.07	11.61	0.84	0.558644	0.570464	0.61264	0.625603	0.0130083	0.00751037
						19.34	30.89	11.55	0.78	0.582367		0.638656
						19.31	30.89	11.58	0.81	0.570382		0.625513
