# Supplementary material for: Dual control of pcdh8l/PCNS expression and function in Xenopus laevis neural crest cells by adam13/33 via the transcription factors tfap2α and arid3a
Source: eLife. 2017 Aug 22;6:e26898. doi: 10.7554/eLife.26898 (PMC5601995; doi:10.7554/eLife.26898)
Supplement: Figure 2—source data 1. [file elife-26898-fig2-data1.xlsx]

## Sheet: Fig 2 b in situ
					Embryos
					Embryos no effect on migration	Embryos showing effect on migration	Total	Ratio	%
				MOA13	9	22	31	0.709677	70.9677	PCNS In situ

## Sheet: Fig 2 a
																	NI	MO13		NI Error
																Set 1	1	0.11		0.4
				GAPDH cT	PCNS cT	∆cT	∆∆cT (Reference lowest gene value)	Power	Avg	Avg Power of Group/Avg power of NI	Avg	SD	SEM			Set 2	1	0.58		0.103
			NI	26.28	30.13	3.85	0	1	0.846089	1.18191	1	0.178918	0.103299			Set 3	1	0.57		0.03
				25.94	30.04	4.1	0.25	0.840896		0.993862						Set 4	1	0.63		0.063
				25.22	29.59	4.37	0.52	0.697372		0.824229						Set 5	1	0.67		0.048
			MO13	25.35	29.87	4.52	0.67	0.628507	0.495649	0.742837	0.585811	0.234151	0.135187			Set 6	1	0.95		0.011
				25.05	30.8	5.75	1.9	0.267943		0.316684						Avg.	1	0.585	Avg. Error NI	0.109167
				25.2	29.81	4.61	0.76	0.590496		0.697912						Std Dev	0	0.271422
																Std error		0.121384
				GAPDH cT	PCNS cT	∆cT	∆∆cT (Reference lowest dct value)	Power	Avg	Avg Power of Group/Avg power of NI	Avg	SD	SEM
			Non-Injected	25.37	33.25	7.88	0.07	0.952638	0.94716	1.00578	1	0.0588926	0.0340017
				24.68	32.66	7.98	0.17	0.888843		0.938429
				24.13	31.94	7.81	0	1		1.05579
			MO13 (5 ng)	24.81	34.72	9.91	2.1	0.233258	0.26035	0.246271	0.274874	0.0284631	0.0164332
				24.7	34.45	9.75	1.94	0.260616		0.275156
				24.69	34.3	9.61	1.8	0.287175		0.303195
			MO13 (10 ng)	24.35	33.9	9.55	1.74	0.29937	0.308569	0.316071	0.325783	0.00848859	0.00490089
				24.26	33.75	9.49	1.68	0.312083		0.329493
				24.2	33.68	9.48	1.67	0.314253		0.331785
			MO13 (20 ng)	24.64	33.74	9.1	1.29	0.408951	0.467356	0.431765	0.493428	0.0535252	0.0309028
				24.3	33.13	8.83	1.02	0.493116		0.520626
				24.2	33.01	8.81	1	0.5		0.527894
			MO13 (25 ng)	25.86	34.92	9.06	1.25	0.420448	0.426103	0.443904	0.449875	0.0333051	0.0192287
				25.37	34.51	9.14	1.33	0.397768		0.419959
				24.99	33.92	8.93	1.12	0.460094		0.485761
			GAPDH cT	PCNS cT	∆cT	∆∆cT (Reference lowest dct value)	Power	Avg	Avg Power of Group/Avg power of NI	Avg	SD	SEM
		NI	20.06	31	10.94	0.95	0.517632	0.573565	0.902482	1	0.699837	0.404051
			20.23	30.22	9.99	0	1		1.74348
			20.05	32.34	12.29	2.3	0.203063		0.354037
		MO13	19.46	31.54	12.08	2.09	0.234881	0.365187	0.40951	0.636697	0.260777	0.15056
			19.31	30.89	11.58	1.59	0.332171		0.579135
			19.34	30.25	10.91	0.92	0.528509		0.921445
