# Supplementary material for: Dual control of pcdh8l/PCNS expression and function in Xenopus laevis neural crest cells by adam13/33 via the transcription factors tfap2α and arid3a
Source: eLife. 2017 Aug 22;6:e26898. doi: 10.7554/eLife.26898 (PMC5601995; doi:10.7554/eLife.26898)
Supplement: Figure 3—source data 1. [file elife-26898-fig3-data1.xlsx]

## Sheet: Fig 3 a
			Set 1	GAPDH cT	PCNS cT	∆cT	∆∆cT (Referece Lowest dct value)	Power	Avg	Avg power treatment/Avg power NI	Avg	SD	SEM
			Non-Injected	26.83	32.66	5.83	4.25	0.052556	0.0903461	0.581719	1	0.390541	0.225479
				26.71	31.67	4.96	3.38	0.0960547		1.06319
				26.51	31.12	4.61	3.03	0.122428		1.3551
			ADAM 13	28.25	30.31	2.06	0.48	0.716978	0.787718	7.9359	8.71889	2.07224	1.19641
				27.91	30.12	2.21	0.63	0.646176		7.15223
				27.71	29.29	1.58	0	1		11.0685
			ADAM 13 E/A	25.72	31.63	5.91	4.33	0.049721	0.0509128	0.55034	0.563531	0.0851109	0.0491388
				25.33	31.42	6.09	4.51	0.0438889		0.485786
				25.26	30.92	5.66	4.08	0.0591286		0.654468
			Delta cyto	25.45	30.47	5.02	3.44	0.0921418	0.0926062	1.01988	1.02502	0.0358765	0.0207133
				25.37	30.33	4.96	3.38	0.0960547		1.06319
				25.04	30.1	5.06	3.48	0.0896222		0.991988
			C13	24.88	31.18	6.3	4.72	0.0379436	0.0440682	0.41998	0.487771	0.0671044	0.0387427
				24.84	30.74	5.9	4.32	0.0500669		0.554168
				24	30.08	6.08	4.5	0.0441942		0.489165
			Set 2	GAPDH cT	PCNS cT	∆cT	∆∆cT (Referece Lowest dct value)	Power	Avg	Avg power treatment/Avg power NI	Avg	SD	SEM
			NI	21.65	33.97	12.32	4.8	0.0358968	0.0901684	0.398109	1	0.683195	0.394443
				21.34	32.55	11.21	3.69	0.0774817		0.8593
				21.12	31.31	10.19	2.67	0.157127		1.74259
			A13	23.45	30.97	7.52	0	1	0.765789	11.0904	8.49288	2.41128	1.39216
				23.09	31.07	7.98	0.46	0.726986		8.06254
				23.02	31.35	8.33	0.81	0.570382		6.32574
			A13 E/A	21.78	34.07	12.29	4.77	0.0366511	0.0369315	0.406474	0.409584	0.0187061	0.0108
				21.45	33.79	12.34	4.82	0.0354026		0.392628
				21.34	33.55	12.21	4.69	0.0387409		0.42965
			delta cyto	22.45	33.53	11.08	3.56	0.0847878	0.0792072	0.940327	0.878436	0.0539201	0.0311308
				22.31	33.53	11.22	3.7	0.0769465		0.853365
				21.97	33.21	11.24	3.72	0.0758872		0.841616
			C13	20.21	32.89	12.68	5.16	0.0279695	0.027999	0.310192	0.310518	0.031122	0.0179683
				19.98	32.52	12.54	5.02	0.0308198		0.341802
				19.56	32.39	12.83	5.31	0.0252076		0.279561
			Set 3	GAPDH cT	PCNS cT	∆cT	∆∆cT (Referece Lowest dct value)	Power	Avg	Avg power treatment/Avg power NI	Avg	SD	SEM
			Non-Injected	26.81	39.67	12.86	3.57	0.0842021	0.237195	0.354991	1	0.632802	0.365348
				26.69	38.02	11.33	2.04	0.243164		1.02516
				26.45	37.12	10.67	1.38	0.384219		1.61984
			ADAM 13	28.72	38.01	9.29	0	1	0.8619	4.21594	3.63372	0.797881	0.460657
				28.55	37.93	9.38	0.09	0.939523		3.96097
				27.79	37.71	9.92	0.63	0.646176		2.72424
			ADAM 13 E/A	26.47	40.41	13.94	4.65	0.03983	0.152017	0.167921	0.640896	0.410161	0.236806
				26.31	37.83	11.52	2.23	0.213159		0.898665
				26.24	37.83	11.59	2.3	0.203063		0.856102
			Delta cyto	25.87	38.67	12.8	3.51	0.0877778	0.10249	0.370066	0.432091	0.118514	0.0684243
				25.73	38.58	12.85	3.56	0.0847878		0.35746
				25.4	37.58	12.18	2.89	0.134904		0.568746
			C13	27.02	38.35	11.33	2.04	0.243164	0.238746	1.02516	1.00654	0.0212428	0.0122646
				26.64	38.03	11.39	2.1	0.233258		0.983403
				26.56	37.91	11.35	2.06	0.239816		1.01105
			Set 4	GAPDH cT	PCNS cT	∆cT	∆∆cT (Referece Lowest dct value)	Power	Avg	Avg power treatment/Avg power NI	Avg	SD	SEM
			NI	27.51	33.12	5.61	0.17	0.888843	0.635579	1.39848	1	0.358373	0.206907
				27.12	33.72	6.6	1.16	0.447513		0.704102
				27.08	33.33	6.25	0.81	0.570382		0.897421
			A13	28.53	34.24	5.71	0.27	0.82932	0.860648	1.30483	1.35412	0.199234	0.115028
				28.3	34.15	5.85	0.41	0.752623		1.18415
				28.18	33.62	5.44	0	1		1.57337
			A13 E/A	26.3	34.07	7.77	2.33	0.198884	0.18172	0.312918	0.285913	0.0233868	0.0135024
				26.32	34.29	7.97	2.53	0.173139		0.272411
				26.08	34.05	7.97	2.53	0.173139		0.272411
			delta cyto	26.06	34.43	8.37	2.93	0.131215	0.107722	0.206449	0.169487	0.033838	0.0195364
				25.82	34.75	8.93	3.49	0.0890031		0.140035
				25.76	34.48	8.72	3.28	0.102949		0.161977
			C13	27.25	34.49	7.24	1.8	0.287175	0.242616	0.451831	0.381725	0.0705414	0.0407271
				26.85	34.63	7.78	2.34	0.19751		0.310757
				26.96	34.44	7.48	2.04	0.243164		0.382586
			Set 5	GAPDH cT	PCNS cT	∆cT	∆∆cT (Referece Lowest dct value)	Power	Avg	Avg power treatment/Avg power NI	Avg	SD	SEM
			Non-Injected	24.95	31.75	6.8	2.74	0.149685	0.141106	1.0608	1	0.0563804	0.0325512
				24.77	31.67	6.9	2.84	0.139661		0.98976
				24.71	31.67	6.96	2.9	0.133972		0.949441
			C 13	26.84	32.15	5.31	1.25	0.420448	0.362367	2.97967	2.56805	0.356562	0.205861
				26.41	32.05	5.64	1.58	0.334482		2.37043
				26.28	31.93	5.65	1.59	0.332171		2.35406
			ADAM 13	27.19	31.85	4.66	0.6	0.659754	0.785709	4.6756	5.56822	1.32193	0.763219
				26.99	31.57	4.58	0.52	0.697372		4.94219
				26.96	31.02	4.06	0	1		7.08688
