# Supplementary material for: Dual control of pcdh8l/PCNS expression and function in Xenopus laevis neural crest cells by adam13/33 via the transcription factors tfap2α and arid3a
Source: eLife. 2017 Aug 22;6:e26898. doi: 10.7554/eLife.26898 (PMC5601995; doi:10.7554/eLife.26898)
Supplement: Figure 4—source data 1. [file elife-26898-fig4-data1.xlsx]

## Sheet: Fig 4b in situ
				In situ	Embryos
					Embryos no effect on migration	Embryos showing effect on migration	Total	Ratio	%
				MOA13	7	22	29	0.758621	AP 2alpha

## Sheet: Fig 4 c luciferase
									NI	MO13			NI	MO13				NI	MO13				NI	MO13
				NI	MO13		Set 1	AP luciferase	11745	7843	Set 2	AP luciferase	7045	5235		Set 3	AP luciferase	7045	7094		Set 4	AP luciferase	12456	5668
			Se1 1	1	0.71			Ranilla	216789	203261		Ranilla	10003	11342			Ranilla	23911	39302			Ranilla	1231567	1000345
			2	1	0.65			A/R	0.0541771	0.0385859		A/R	0.704289	0.461559			A/R	0.294634	0.1805			A/R	0.0101139	0.00566605
			3	1	0.61			Relative fold change	1	0.712217		Relative fold change	1	0.655355			Relative fold change	1	0.612623			Relative fold change	1	0.560221
			4	1	0.56
			Average	1	0.6325
			Std. Dev	0	0.0634429
			Error	0.158397	0.0317214
			Few other sets
				NI	MO13
				1	0.591
				1	0.66
			Average	1	0.6255
			Std. Dev	0	0.0487904
			Error	0.056	0.0243952
						Avg Error
				NI	MO13	NI	MO13
				1	0.62	0.158	0.031
				1	0.6144	0.056	0.024
			Average	1	0.6172	0.107	0.0275

## Sheet: Fig 4 a Ap2a mRNA
				Set 1	GAPDH cT	AP2a cT	∆cT	∆∆cT (Referece Lowest gene value)	Power	Avg	Avg power treatment/Avg power NI	Avg	SD	SEM				NI	M013
				NI	24.75	34.77	10.02	0	1	0.876718	1.14062	1	0.121821	0.0703333			Set 1	1	0.49
					24.24	34.55	10.31	0.29	0.817902		0.932913						Set2	1	0.7
					24.11	34.43	10.32	0.3	0.812252		0.926469						Set3	1	0.72
				MO13	24.37	36.89	12.52	2.5	0.176777	0.349116	0.201635	0.398208	0.170272	0.0983067			Set4	1	0.65
					24.2	35.43	11.23	1.21	0.432269		0.493053						Set 5	1	0.63
					24.02	35.23	11.21	1.19	0.438303		0.499936
																	Avg	1	0.638
																	Std dev		0.0903881
				Set 2	GAPDH cT	AP2a cT	∆cT	∆∆cT (Referece Lowest gene value)	Power	Avg	Avg power treatment/Avg power NI	Avg	SD	SEM	SEM		Std error	0.1	0.0404228
				NI	27.27	31.77	4.5	0.29	0.817902	0.91483	0.932913	1.04347	0.1045	0.0603328
					27.26	31.47	4.21	0	1		1.14062
					27.09	31.41	4.32	0.11	0.926588		1.05688
				MO13	26.76	31.58	4.82	0.61	0.655197	0.620344	0.747329	0.707576	0.0347556	0.0200661
					26.62	31.57	4.95	0.74	0.598739		0.682933
					26.62	31.55	4.93	0.72	0.607097		0.692466
					GAPDH cT	AP2a cT	∆cT	∆∆cT (Referece Lowest gene value)	Power	Avg	Avg power treatment/Avg power NI	Avg	SD	SEM
				Non-Injected	26.29	29.81	3.52	0.24	0.846745	0.857911	0.986986	1	0.159514	0.0920956
					26.06	29.8	3.74	0.46	0.726986		0.847392
					25.8	29.08	3.28	0	1		1.16562
				MO13 (5 ng)	26.15	30.2	4.05	0.77	0.586417	0.621824	0.683542	0.724812	0.0365721	0.0211149
					26.11	30.05	3.94	0.66	0.632878		0.737697
					25.99	29.9	3.91	0.63	0.646176		0.753198
				MO13 (10 ng)	25.49	29.91	4.42	1.14	0.45376	0.593577	0.528912	0.691887	0.175259	0.101186
					25.43	29.51	4.08	0.8	0.574349		0.669474
					25.32	29.01	3.69	0.41	0.752623		0.877275
