# Supplementary material for: Dual control of pcdh8l/PCNS expression and function in Xenopus laevis neural crest cells by adam13/33 via the transcription factors tfap2α and arid3a
Source: eLife. 2017 Aug 22;6:e26898. doi: 10.7554/eLife.26898 (PMC5601995; doi:10.7554/eLife.26898)
Supplement: Figure 5—source data 1. [file elife-26898-fig5-data1.xlsx]

## Sheet: Fig 5 a Ap2a expression
			NI (Normalized to 1)	A13	A13 E/A	Delta Cyto	C13			NI Avg Error
		Set 1	1	4.3	1.6	1.9	3.7			0.0316
		Set 2	1	3.1	2.4	1.6	1.5			0.088
		Set 3	1	5.5	2.2	1.8	2.6			0.0534
		Average	1	4.3	2.06667	1.76667	2.6			0.0576667
		Std. Dev	0	1.2	0.416333	0.152753	1.1
		Std. Err	0.0576667	0.69282	0.24037	0.0881917	0.635085
		Set	GAPDH cT	AP2a cT	∆cT	∆∆cT (referance lowest Expresing gene)	Power	Avg	Avg power treatment/Avg power NI	Avg	SD	SEM
		Non-Injected	24.95	39.04	14.09	3.65	0.07966	0.113122	0.704195	1	0.345282	0.199348
			24.77	38.48	13.71	3.27	0.103665		0.916399
			24.71	37.83	13.12	2.68	0.156041		1.37941
		ADAM 13	24.88	36.93	12.05	1.61	0.327598	0.503051	2.89597	4.44698	1.86497	1.07674
			24.82	36.43	11.61	1.17	0.444421		3.92869
			24.67	35.55	10.88	0.44	0.737135		6.51627
		C 13	26.84	40	13.16	2.72	0.151774	0.106875	1.34169	0.944775	0.358779	0.207141
			26.41	40.63	14.22	3.78	0.0727958		0.643516
			26.28	40.1	13.82	3.38	0.0960547		0.849124
		ADAM 13	27.19	38.6	11.41	0.97	0.510506	0.728041	4.51288	6.43589	2.20332	1.27209
			26.99	38	11.01	0.57	0.673617		5.95478
			26.96	37.4	10.44	0	1		8.84001
		Set	GAPDH cT	AP2a cT	∆cT	∆∆cT (referance lowest Expresing gene)	Power	Avg	Avg power treatment/Avg power NI	Avg	SD	SEM
		Non-Injected	25.03	39.24	14.21	4.33	0.049721	0.139213	0.357157	1	0.801626	0.462819
			25	38.15	13.15	3.27	0.103665		0.744647
			24.96	36.76	11.8	1.92	0.264255		1.8982
		ADAM 13	25.08	36.15	11.07	1.19	0.438303	0.673557	3.14842	4.8383	2.09563	1.20992
			24.97	35.63	10.66	0.78	0.582367		4.18326
			24.78	34.66	9.88	0	1		7.18321
		C 13	27.65	44.35	16.7	6.82	0.00885066	0.0353037	0.0635761	0.253594	0.28411	0.164031
			27.53	43.35	15.82	5.94	0.0162885		0.117004
			27.29	40.8	13.51	3.63	0.0807721		0.580203
		ADAM 13	25.15	36.18	11.03	1.15	0.450625	0.499317	3.23694	3.5867	0.644784	0.372266
			25.11	36.16	11.05	1.17	0.444421		3.19237
			25.1	35.71	10.61	0.73	0.602904		4.33079

## Sheet: Fig 5c PCNS
					NI	A13	MOC A13	MoA A13		NI Avg Error
				Set 1	1	18.6	25	3.3		0.1016
				Set 2	1	18	21.1	6.6		0.148
				Set 3	1	20.1	23	4.6		0.1534
				Avg	1	18.9	23.0333	4.83333		0.134333
				Std Dev		1.08167	1.95021	1.66233
				Std. Err	0.134	0.6245	1.12596	0.959745
				Few more sets
				Calculations	GAPDH cT	PCNS cT	∆cT	∆∆cT (referance lowest Expresing gene)	Power	Avg	Avg power treatment/Avg power NI	Avg	SD	SEM
				Non-Injected	24.93	37.73	12.8	1.8	0.287175	0.31705	0.90577	1	0.206971	0.119495
					24.59	37.47	12.88	1.88	0.271684		0.856911
					24.38	36.73	12.35	1.35	0.392292		1.23732
				A13	27.42	39.43	12.01	1.01	0.496546	0.621705	1.56614	1.9609	1.05284	0.60786
					26.96	39.4	12.44	1.44	0.368567		1.16249
					26.93	37.93	11	0	1		3.15408
				MOC A13	25	37.61	12.61	1.61	0.327598	0.357731	1.03327	1.12831	0.0978637	0.0565016
					24.73	37.22	12.49	1.49	0.356013		1.12289
					24.38	36.74	12.36	1.36	0.389582		1.22877
				MoA A13	24.89	36.81	11.92	0.92	0.528509	0.47691	1.66696	1.50421	0.281886	0.162747
					24.67	36.59	11.92	0.92	0.528509		1.66696
					24.49	36.91	12.42	1.42	0.373712		1.17872
					GAPDH cT	PCNS cT	∆cT	∆∆cT (referance lowest Expresing gene)	Power	Avg	Avg power treatment/Avg power NI	Avg	SD	SEM	SEM
				Non-Injected	24.16	33.21	9.05	1.54	0.343885	0.341249	1.00773	1	0.106823	0.0616741
					23.95	32.87	8.92	1.41	0.376312		1.10275
					23.63	32.86	9.23	1.72	0.303549		0.889524
				A13	23.84	31.68	7.84	0.33	0.795536	0.886691	2.33125	2.59837	0.304811	0.175983
					23.82	31.54	7.72	0.21	0.864537		2.53345
					23.76	31.27	7.51	0	1		2.93041
				MOC A13	25.96	33.98	8.02	0.51	0.702222	0.741314	2.0578	2.17236	0.121142	0.0699414
					25.82	33.68	7.86	0.35	0.784584		2.29916
					25.6	33.55	7.95	0.44	0.737135		2.16011
				MoA A13	23.85	32.67	8.82	1.31	0.403321	0.30333	1.1819	0.888884	0.299756	0.173064
					23.45	32.66	9.21	1.7	0.307786		0.901941
					22.93	32.77	9.84	2.33	0.198884		0.582813

## Sheet: Fig 5dAP2a
						NI	A13	MOC A13	MoA A13		NI Avg Error
					Set 1	1	4.1	4.4	0.87		0.0916
					Set 2	1	3.5	3.4	0.67		0.1138
					Set 3	1	3.23	4.1	0.74		0.0544
					Avg	1	3.61	3.96667	0.76		0.0866
					Std Dev		0.445309	0.51316	0.101489
					Std. Err	0.0866	0.257099	0.296273	0.0585947
						GAPDH cT	AP2a cT	∆cT	∆∆cT (referance lowest Expresing gene)	Power	Avg	Avg power treatment/Avg power NI	Avg	SD	SEM
					Non-Injected	24.93	33.87	8.94	1.07	0.476319	0.569802	0.835938	1	0.178703	0.103174
						24.59	33.31	8.72	0.85	0.554785		0.973645
						24.38	32.81	8.43	0.56	0.678302		1.19042
					A13	27.42	35.61	8.19	0.32	0.80107	0.766627	1.40587	1.34543	0.188578	0.108876
						26.96	35.46	8.5	0.63	0.646176		1.13404
						26.93	35.03	8.1	0.23	0.852635		1.49637
					MOC A13	25	33.75	8.75	0.88	0.543367	0.823318	0.953608	1.44492	0.430338	0.248456
						24.73	32.6	7.87	0	1		1.755
						24.38	32.36	7.98	0.11	0.926588		1.62616
					MoA A13	24.89	34.22	9.33	1.46	0.363493	0.381042	0.637929	0.668727	0.0356806	0.0206002
						24.67	33.95	9.28	1.41	0.376312		0.660425
						24.49	33.67	9.18	1.31	0.403321		0.707826
						GAPDH cT	AP2a cT	∆cT	∆∆cT (referance lowest Expresing gene)	Power	Avg	Avg power treatment/Avg power NI	Avg	SD	SEM
					Non-Injected	24.16	35.53	11.37	1.62	0.325335	0.320051	1.01651	1	0.113835	0.0657225
						23.95	35.53	11.58	1.83	0.281265		0.878811
						23.63	34.88	11.25	1.5	0.353553		1.10468
					A13	23.84	34.73	10.89	1.14	0.45376	0.548608	1.41777	1.71413	0.287192	0.16581
						23.82	34.42	10.6	0.85	0.554785		1.73343
						23.76	34.16	10.4	0.65	0.63728		1.99118
					MOC A13	25.96	35.71	9.75	0	1	0.935914	3.1245	2.92426	0.27615	0.159435
						25.82	35.61	9.79	0.04	0.972655		3.03906
						25.6	35.61	10.01	0.26	0.835088		2.60923
					MoA A13	23.85	35.15	11.3	1.55	0.34151	0.290546	1.06705	0.907812	0.167067	0.0964561
						23.45	34.96	11.51	1.76	0.295248		0.922503
						22.93	34.77	11.84	2.09	0.234881		0.733885
							Table Analyzed	Data 1
							One-way analysis of variance
							P value	P<0.01
							P value summary	**
							Are means signif. different? (P < 0.05)	Yes
							Number of groups	4
							F	58.88
							R squared	0.9567
							ANOVA Table	SS	df	MS
							Treatment (between columns)	24.42	3	8.141
							Residual (within columns)	1.106	8	0.1383
							Total	25.53	11
							Newman-Keuls Multiple Comparison Test	Mean Diff.	q	Significant? P < 0.05?	Summary
							A13 AP vs A13 Mo cat	-3.055	14.23	Yes	***
							A13 AP vs A13	-2.844	13.25	Yes	***
							A13 AP vs NI	-0.2083	0.9702	No	ns
							NI vs A13 Mo cat	-2.847	13.26	Yes	**
							NI vs A13	-2.636	12.28	Yes	**
							A13 vs A13 Mo cat	-0.2112	0.9839	No	ns

## Sheet: Fig 5 b luciferase
			CS2	A9	A13	A19	A13 E/A	delta cyto	delta cyto E/A	C13-GFP
		set 1	1	0.9	3.2	3.9	3.1	1.2	1.1	1.4
		set 2	1	0.85	3.6	4.3	2.7	1.4	1.37	0.9
		set 3	1.2	0.62	3.7	3.6	3	1.4	1.3	0.94
		set 4	0.8	1.5	3.1	3.7	2.4	1.1	1.2	0.57
		Avg	1	0.9675	3.4	3.875	2.8	1.275	1.2425	0.9525
		STd. Dev	0.163299	0.375355	0.294392	0.30957	0.316228	0.15	0.117863	0.341309
		error	0.0816497	0.187678	0.147196	0.154785	0.158114	0.075	0.0589315	0.170654
						Folg change AP2a Luc/Ranilla
		Set 1	CS2	0.0058	0.0058	1
				0.0058
			A13	0.0091	0.0099	1.7069
				0.0107
			A13 E/A	0.0063	0.00595	1.02586
				0.0056
			A13 delta	0.004	0.0049	0.844828		CS2	ADAM 13	ADAM 13 E/A	ADAM 13 delta	C13
				0.0058				1	1.7069	1.02586	0.844828	0.887931
			C13	0.0044	0.00515	0.887931
				0.0059					1.02586
		Set 2		0.57
			CS2	0.003	1
			A13	0.013	4.33333
			A13 E/A	0.0051	1.7
			A13 delta	0.0025	0.833333
			C13	0.0068	2.26667		CS2	ADAM 13	ADAM 13 E/A	ADAM 13 delta	C13
							1	4.33333	1.7	0.833333	2.26667
