# Supplementary material for: Dual control of pcdh8l/PCNS expression and function in Xenopus laevis neural crest cells by adam13/33 via the transcription factors tfap2α and arid3a
Source: eLife. 2017 Aug 22;6:e26898. doi: 10.7554/eLife.26898 (PMC5601995; doi:10.7554/eLife.26898)
Supplement: Figure 7—figure supplement 1—source data 1. [file elife-26898-fig7-figsupp1-data1.xlsx]

## Sheet: Fig 7 b supp bFoxD3
				GAPDH cT	FoxD3 cT	∆cT	∆∆cT (Referece Lowest ct value)	Power	Avg	Avg power treatment/Avg power NI	Avg	SD	SEM						NI	A13	MO13
			NI	19.2	24.42	5.22	0.35	0.784584	0.882236	0.889313	1	0.110423	0.0637526					Set 1	1	1.004	1.15
				19.07	24.12	5.05	0.18	0.882703		1.00053								Set 2	1	1.29	0.9
				18.97	23.87	4.9	0.03	0.97942		1.11016								Set 3	1	0.89	0.73
			A13	21.45	26.58	5.13	0.26	0.835088	0.886226	0.946559	1.00452	0.111873	0.06459					Avg		1.06133	0.926667
				21.21	26.36	5.15	0.28	0.823591		0.933527										0.206071	0.211266
				21.17	26.04	4.87	0	1		1.13348								Error	0.0714806	0.118975	0.121974
			M013	20.97	25.98	5.01	0.14	0.907519	0.646866	1.02866	0.733212	0.257665	0.148763
				20.86	26.61	5.75	0.88	0.543367		0.615898
				20.57	26.47	5.9	1.03	0.48971		0.555079
				GAPDH cT	FoxD3 cT	∆cT	∆∆cT (Referece Lowest ct value)	Power	Avg	Avg power treatment/Avg power NI	Avg	SD	SEM
			NI	17.21	25.31	8.1	0.4	0.757858	0.67536	1.12216	1	0.120886	0.0697934
				16.98	25.25	8.27	0.57	0.673617		0.99742
				16.56	25.01	8.45	0.75	0.594604		0.880425
			A13	19.24	27.46	8.22	0.52	0.697372	0.874653	1.03259	1.29509	0.233738	0.134949
				19.45	27.26	7.81	0.11	0.926588		1.37199
				19.41	27.11	7.7	0	1		1.48069
			M013	20.12	28.12	8	0.3	0.812252	0.60846	1.2027	0.900943	0.266947	0.154122
				19.87	28.45	8.58	0.88	0.543367		0.80456
				19.75	28.54	8.79	1.09	0.469761		0.695572
				GAPDH cT	FoxD3 cT	∆cT	∆∆cT (Referece Lowest ct value)	Power	Avg	Avg power treatment/Avg power NI	Avg	SD	SEM
			NI	26.56	34.89	8.33	0.13	0.913831	0.823641	1.1095	1	0.141043	0.0814313
				26.21	34.62	8.41	0.21	0.864537		1.04965
				25.41	34.14	8.73	0.53	0.692555		0.840845
			A13	27.24	36.01	8.77	0.57	0.673617	0.731778	0.817852	0.888468	0.0675989	0.0390282
				26.84	35.39	8.55	0.35	0.784584		0.95258
				26.51	35.15	8.64	0.44	0.737135		0.894971
			M013	27.91	36.11	8.2	0	1	0.948266	1.21412	1.15131	0.0946861	0.0546671
				27.43	35.85	8.42	0.22	0.858565		1.0424
				27.01	35.23	8.22	0.02	0.986233		1.19741

## Sheet: Fig 7a SuppArid3a
					GAPDH cT	Arid3a cT	∆cT	∆∆cT (Referece Lowest gene value)	Power	Avg	Avg power treatment/Avg power NI	Avg	SD	SEM				NI	A13	MO13		Err NI
				NI	19.2	31.96	12.76	1.3	0.406126	0.495013	0.820435	1	0.178036	0.102789			Set 1	1	1.418	0.83		0.102789
					19.07	31.54	12.47	1.01	0.496546		1.0031						Set 2	1	1.31	0.913		0.0982286
					18.97	31.21	12.24	0.78	0.582367		1.17647						Set 3	1	1	1.22		0.289848
				A13	21.45	32.91	11.46	0	1	0.702019	2.02015	1.41818	0.522022	0.30139			Avg	1	1.24267	0.987667	Avg	0.163622
					21.21	33.56	12.35	0.89	0.539614		1.0901							0	0.216982	0.205442
					21.17	33.45	12.28	0.82	0.566442		1.1443						Std Err	0	0.125275	0.118612
				M013	20.97	33.08	12.11	0.65	0.63728	0.606696	1.2874	1.22562	0.0851057	0.0491358
					20.86	33.16	12.3	0.84	0.558644		1.12854
					20.57	32.71	12.14	0.68	0.624165		1.26091
					GAPDH cT	Arid3a cT	∆cT	∆∆cT (Referece Lowest gene value)	Power	Avg	Avg power treatment/Avg power NI	Avg	SD	SEM
				NI	17.21	30.31	13.1	0.68	0.624165	0.548977	1.13696	1	0.170137	0.0982286		SEM
					16.98	30.19	13.21	0.79	0.578344		1.05349
					16.56	30.15	13.59	1.17	0.444421		0.809545
				A13	19.24	31.66	12.42	0	1	0.724316	1.82157	1.31939	0.435151	0.251235
					19.45	32.66	13.21	0.79	0.578344		1.05349
					19.41	32.58	13.17	0.75	0.594604		1.08311
				M013	20.12	33.18	13.06	0.64	0.641713	0.501295	1.16893	0.913144	0.223525	0.129052
					19.87	33.45	13.58	1.16	0.447513		0.815176
					19.75	33.44	13.69	1.27	0.41466		0.755332
					GAPDH cT	Arid3a cT	∆cT	∆∆cT (Referece Lowest gene value)	Power	Avg	Avg power treatment/Avg power NI	Avg	SD	SEM
				NI	26.56	37.1	10.54	0	1	0.635012	1.57477	1	0.498508	0.287814		SEM
					26.21	37.84	11.63	1.09	0.469761		0.739767
					25.41	37.15	11.74	1.2	0.435275		0.68546
				A13	27.24	38.51	11.27	0.73	0.602904	0.645234	0.949437	1.0161	0.262978	0.15183
					26.84	38.37	11.53	0.99	0.503478		0.792863
					26.51	37.32	10.81	0.27	0.82932		1.30599
				M013	27.91	39.55	11.64	1.1	0.466516	0.527503	0.734658	0.830697	0.309685	0.178797
					27.43	38.39	10.96	0.42	0.747425		1.17702
					27.01	38.99	11.98	1.44	0.368567		0.58041
