# Supplementary material for: Dual control of pcdh8l/PCNS expression and function in Xenopus laevis neural crest cells by adam13/33 via the transcription factors tfap2α and arid3a
Source: eLife. 2017 Aug 22;6:e26898. doi: 10.7554/eLife.26898 (PMC5601995; doi:10.7554/eLife.26898)
Supplement: Figure 7—source data 1. [file elife-26898-fig7-data1.xlsx]

## Sheet: Fig 7 AP2a
																		NI (Normalized to 1)	ADAM13	ADAM13+MOArid3A	ADAM13+MOFoxD3
			set 1	GAPDH cT	PCNS cT	∆cT	∆∆cT (Referece Lowest gene value)	Power	Avg	Avg power treatment/Avg power NI	Avg	SD	SEM				Set1	1	2.1	0.5	2.6
			NI	33.12	38.46	5.34	1.65	0.31864	0.386511	0.824402	1	0.198508	0.114609				Set2	1	2.9	1.1	1.45
				32.42	37.54	5.12	1.43	0.371131		0.960208							Set3	1	0.8	1.1	0.45
				32.32	37.1	4.78	1.09	0.469761		1.21539							Set4	1	1.1	0.31	1.7
			A13	33.41	37.1	3.69	0	1	0.846622	2.58725	2.19042	0.365385	0.210955				Set5	1	1.3	0.41	2.1
				32.86	36.84	3.98	0.29	0.817902		2.11612							Set6	1	1.13	1.2
				32.66	36.82	4.16	0.47	0.721965		1.8679							Set7	1	1.01	0.1
			A13+MOArid3a	32.17	38.48	6.31	2.62	0.162668		0.420862	0.411689	0.0587686	0.03393				Set8	1	1.63	2.3
				31.92	37.97	6.05	2.36	0.194791		0.503973							Avg	1	1.49625	0.8775	1.66
				31.15	37.9	6.75	3.06	0.119908		0.310232								0	0.69732	0.708535	0.804208
			A13+MOAP2a	35.31	39.1	3.79	0.1	0.933033		2.41399	2.35492	0.102315	0.0590719				Error	0.06	0.24654	0.250505	0.28433
				34.92	38.71	3.79	0.1	0.933033		2.41399
				34.56	38.46	3.9	0.21	0.864537		2.23677
			set 2	GAPDH cT	PCNS cT	∆cT	∆∆cT (Referece Lowest gene value)	Power	Avg	Avg power treatment/Avg power NI	Avg	SD	SEM
			NI	33.02	47.58	14.56	4.56	0.0423939	0.0441496	0.960233	1	0.0631832	0.0364788
				32.66	47.21	14.55	4.55	0.0426888		0.966912
				32.37	46.77	14.4	4.4	0.0473661		1.07286
			A13	33.32	47.21	13.89	3.89	0.0674518	0.0722265	1.5278	1.63595	0.224475	0.1296
				32.77	46.7	13.93	3.93	0.0656073		1.48602
				32.7	46.28	13.58	3.58	0.0836205		1.89403
			A13+MOArid3a	33.75	53.06	19.31	9.31	0.00157547		0.0356849	1.22487	1.68176	0.970964
				33.59	46.82	13.23	3.23	0.106579		2.41405
				33.57	43.57	10	0	1		22.6503
			A13+MOAP2a	31.24	48.58	17.34	7.34	0.0061722		0.139802	1.45052	1.20713	0.696934
				31.21	44.38	13.17	3.17	0.111105		2.51657
				31.11	44.85	13.74	3.74	0.0748424		1.6952

## Sheet: Fig 7a PCNS
				NI	ADAM13	ADAM13+MOArid3A	ADAM13+MOFoxD3		NI Avg Err
			Set 1	1	2.1	0.51	2.3		0.19
			Set 2	1	2.3	0.98	1.44		0.02
			Set 3	1	1.35	1.3	1.76		0.001
			Set 4	1	2.1	1.5	1.37		0.009
			Avg	1	1.9625	1.0725	1.7175		0.055
				0	0.419076	0.431847	0.423822
			Error	0	0.241954	0.249327	0.244694
				GAPDH cT	AP2a cT	∆cT	∆∆cT (Referece Lowest dct value)	Power	Avg	Avg power treatment/Avg power NI	Avg	SD	SEM
			NI	33.12	38.59	5.47	1.64	0.320856	0.431103	0.744269	1	0.342293	0.197623
				32.42	37.67	5.25	1.42	0.373712		0.866875
				32.32	36.89	4.57	0.74	0.598739		1.38886
			A13	33.41	37.67	4.26	0.43	0.742262	0.911785	1.72177	2.11501	0.340642	0.19667
				32.86	36.7	3.84	0.01	0.993092		2.30361
				32.66	36.49	3.83	0	1		2.31963
			A13+MO Arid3a	32.17	39.01	6.84	3.01	0.124137		0.287951	0.511798	0.23284	0.13443
				31.92	37.66	5.74	1.91	0.266093		0.617237
				31.15	36.86	5.71	1.88	0.271684		0.630206
			A13+MOFoxD3	35.31	40.78	5.47	1.64	0.320856		0.744269	1.44162	1.00348	0.579357
				34.92	39.98	5.06	1.23	0.426317		0.9889
				34.56	38.23	3.67	-0.16	1.11729		2.5917
				GAPDH cT	AP2a cT	∆cT	∆∆cT (Referece Lowest gene value)	Power	Avg	Avg power treatment/Avg power NI	Avg	SD	SEM
			NI	33.02	38.08	5.06	1.52	0.348686	0.333936	1.04417	1	0.0450096	0.0259863
				32.66	37.78	5.12	1.58	0.334482		1.00163
				32.37	37.56	5.19	1.65	0.31864		0.954195
			A13	33.32	37.11	3.79	0.25	0.840896	0.775921	2.51814	2.32356	0.279509	0.161375
				32.77	36.89	4.12	0.58	0.668964		2.00327
				32.7	36.53	3.83	0.29	0.817902		2.44928
			A13+MO Arid3a	31.24	36.51	5.27	1.73	0.301452		0.902724	0.985908	0.122758	0.0708745
				31.21	36.44	5.23	1.69	0.309927		0.928103
				31.11	36.06	4.95	1.41	0.376312		1.1269
			A13+MOFoxD3	33.75	37.86	4.11	0.57	0.673617		2.0172	2.39126	0.102376	0.0591069
				33.59	37.6	4.01	0.47	0.721965		2.16199
				33.57	37.11	3.54	0	1		2.99459
