# Supplementary material for: Dual control of pcdh8l/PCNS expression and function in Xenopus laevis neural crest cells by adam13/33 via the transcription factors tfap2α and arid3a
Source: eLife. 2017 Aug 22;6:e26898. doi: 10.7554/eLife.26898 (PMC5601995; doi:10.7554/eLife.26898)
Supplement: Figure 8—source data 1. [file elife-26898-fig8-data1.xlsx]

## Sheet: Fig 8c Ap luc
											Ranilla	Apluc	Apluc/Ranilla	Fold change
										CS2	22345	3216	0.143925	0.999999
										Adam13	24561	11452	0.466268	3.23966
										Smad2	19678	3586	0.182234	1.26617
										Adam13+smad2	18213	8774	0.481744	3.34719
										smad7	27896	4889	0.175258	1.2177
										Adam13+smad7	26543	9243	0.348227	2.41951
										CS2	10981	2172	0.197796	1
										Adam13	9024	5469	0.606051	3.06402
										Smad2	8675	1889	0.217752	1.10089
										Adam13+smad2	13212	7162	0.542083	2.74062
										smad7	8912	2091	0.234627	1.18621
										Adam13+smad7	13456	7573	0.562797	2.84534
										CS2	23456	5431	0.23154	1
										Adam13	23791	16721	0.702829	3.03545
										Smad2	19023	4172	0.219313	0.947195
										Adam13+smad2	18725	13325	0.711615	3.0734
										smad7	16732	4903	0.293031	1.26558
										Adam13+smad7	21456	14183	0.661027	2.85492
								CS2	ADAM13	Smad2	ADAM13+SMAD2	Smad7	ADAM13+Smad7
							Avg	1	3.10667	1.1	3	1.22333	2.9
							Error	0.01	0.0635959	0.11547	0.173205	0.024037	0.321455
						CS2 (Normalized to 1)	ADAM13	Smad2	ADAM13+SMAD2	Smad7	ADAM13+Smad7
					Set 1	1	3.22	1.3	3.3	1.21	2.4
					Set 2	1	3.1	1.1	2.7	1.19	2.8
					Set 3	1	3	0.9	3	1.27	3.5
					Avg	1	3.10667	1.1	3	1.22333	2.9
					Std.Dev	0	0.110151	0.2	0.3	0.0416333	0.556776
					STd. Err	0	0.0635959	0.11547	0.173205	0.024037	0.321455

## Sheet: Fig 8 b
				NI	ADAM13	ADAM13+MOSmad2		NI Avg Error
			Set 1	1	1.98	1.23		0.005
			Set 2	1	1.23	1.34		0.018
			Set 3	1	1.76	1.51		0.021
			Set 4	1	1.6	1.63		0.016
			Set 5	1	2.1	1.1		0.018
			Avg	0	0.255343	0.277909		0.0156
			STD err	0	0.147422	0.160451
			Avg	1	1.734	1.362
			Calculations	GAPDH cT	PCNS cT	∆cT	∆∆cT (Referece Lowest gene value)	Power	Avg	Avg power treatment/Avg power NI	Avg	SD	SEM
			NI	26.99	30.1	3.11	3.11	0.115824	0.148633	0.779259	1	0.194999	0.112583
				26.89	29.54	2.65	2.65	0.15932		1.0719
				26.89	29.44	2.55	2.55	0.170755		1.14884
			A13	25.45	27.5	2.05	2.05	0.241484	0.262256	1.6247	1.76445	0.122522	0.0707381
				25.43	27.32	1.89	1.89	0.269807		1.81526
				25.25	27.11	1.86	1.86	0.275476		1.8534
			A13+MOSmad2	24.54	27.35	2.81	2.81	0.142595	0.179134	0.95938	1.20521	0.0837088	0.0483293
				24.32	27.32	3	3	0.125		0.840998
				24.21	26.1	1.89	1.89	0.269807		1.81526
			NI	ADAM13	ADAM13+MOSmad2
			1	1.76445	1.20521
			0.112583	0.160245	0.0221006

## Sheet: Fig 8 a
					NI	ADAM13	ADAM13+MOSmad2	NI Avg Error		NI Avg Error
				Set 1	1	3.1	3.2	0.005		0.005
				Set 2	1	3.3	2.7	0.018		0.018
				Set 3	1	3.1	2.9	0.021		0.021
				Set 4	1	3.1	2.9	0.016		0.016
				Set 5	1	2.6	3.36	0.018		0.018
				Std Err		0.260768	0.264045	0.0156		0.0156
				STD err		0.150555	0.152447
				Avg	1	3.04	3.012
				Calculations	GAPDH cT	AP2a cT	∆cT	∆∆cT (Referece Lowest ct value)	Power	Avg	Avg power treatment/Avg power NI	Avg	SD	SEM
				NI	26.99	26.34	-0.65	2.11	0.231647	0.253593	0.913461	1	0.0904164	0.052202
					26.89	26.12	-0.77	1.99	0.251739		0.99269
					26.89	25.98	-0.91	1.85	0.277392		1.09385
				A13	25.45	23.13	-2.32	0.44	0.737135	0.798923	2.90677	3.15042	0.239533	0.138295
					25.43	22.99	-2.44	0.32	0.80107		3.15888
					25.25	22.71	-2.54	0.22	0.858565		3.38561
				A13+MOSmad2	24.54	22.38	-2.16	0.6	0.659754	0.751453	2.60163	2.96323	0.181662	0.104883
					24.32	22.31	-2.01	0.75	0.594604		2.34472
					24.21	21.45	-2.76	0	1		3.94333
				Set (Extra)	NI	ADAM13RNA	MOSmad2+ADAM13RNA
					1	1.3074	0.757013
					0.124382	0.135121	0.215498
