# Supplementary material for: Dual control of pcdh8l/PCNS expression and function in Xenopus laevis neural crest cells by adam13/33 via the transcription factors tfap2α and arid3a
Source: eLife. 2017 Aug 22;6:e26898. doi: 10.7554/eLife.26898 (PMC5601995; doi:10.7554/eLife.26898)
Supplement: Figure 9—source data 1. [file elife-26898-fig9-data1.xlsx]

## Sheet: Fig 9 E
														No. of Embryos
					RFP (Normalized to zero)	RFP+MO13	RFP+MO13+PCNS	RFP+MO13+Ap2a	RFP+MO13+Arid3a					RFP	RFP+MO13	RFP+MO13+PCNS	RFP+MO13+AP2a	RFP+MO13+Arid3a				NI Error
				Set 1	0	53	34	44	42					26	32	36	46	31				1.4
				Set 2	0	63	52	36	54					25	26	42	28	32				1.6
				Set 3	0	56	33	39	58					27	32	36	38	50				1.9
				Set 4	0	62	33	42						31	35	41	45					1.2
				Set 5	0	67	31							30	39	43						1.7
				Avg	0	60.2	36.6	40.25	51.3333					139	164	198	157	113			Avg.	1.56
				Std.Dev	0	5.63028	8.67756	3.5	8.32666
				Std Err	1.56 (Avg Err)	2.51794	3.88072	1.56525	3.7238

## Sheet: In Situ 9 Fig a, b, c
					Embryos
					Embryos no effect on migration	Embryos showing effect on migration	Total	Ratio	In situ
				MOArid3a	8	21	29	0.724138	PCNS
					7	20	27	0.740741	AP2a
					6	25	31	0.806452	Slug
