# Supplementary material for: Dual control of pcdh8l/PCNS expression and function in Xenopus laevis neural crest cells by adam13/33 via the transcription factors tfap2α and arid3a
Source: eLife journal article supplement (doi:10.7554/elife.26898), 2017-08-22
Supplement: supp [file elife_poa_e26898_Source_Data_File.xlsx]

## Sheet: Fig 3 a
		Set 1	GAPDH cT	PCNS cT	∆cT	∆∆cT	Power	Avg	Avg power treatment/Avg power NI	Avg	SD	SEM			Table Analyzed	Data 1
			21.65	33.97	12.32	4.8	0.0358968	0.0901684	0.398109	1	0.683195	0.394443
			21.34	32.55	11.21	3.69	0.0774817		0.8593						One-way analysis of variance
			21.12	31.31	10.19	2.67	0.157127		1.74259						P value	P<0.0001
			23.45	30.97	7.52	0	1	0.765789	11.0904	8.49288	2.41128	1.39216			P value summary	***
			23.09	31.07	7.98	0.46	0.726986		8.06254						Are means signif. different? (P < 0.05)	Yes
			23.02	31.35	8.33	0.81	0.570382		6.32574						Number of groups	5
			21.78	34.07	12.29	4.77	0.0366511	0.0369315	0.406474	0.409584	0.0187061	0.0108			F	29.57
			21.45	33.79	12.34	4.82	0.0354026		0.392628						R squared	0.922
			21.34	33.55	12.21	4.69	0.0387409		0.42965
			22.45	33.53	11.08	3.56	0.0847878	0.0792072	0.940327	0.878436	0.0539201	0.0311308			ANOVA Table	SS	df	MS
			22.31	33.53	11.22	3.7	0.0769465		0.853365						Treatment (between columns)	148.7	4	37.17
			21.97	33.21	11.24	3.72	0.0758872		0.841616						Residual (within columns)	12.57	10	1.257
			20.21	32.89	12.68	5.16	0.0279695	0.027999	0.310192	0.310518	0.031122	0.0179683			Total	161.3	14
			19.98	32.52	12.54	5.02	0.0308198		0.341802
			19.56	32.39	12.83	5.31	0.0252076		0.279561						Newman-Keuls Multiple Comparison Test	Mean Diff.	q	Significant? P < 0.05?	Summary
															C13 vs A13	-8.182	12.64	Yes	***
															C13 vs nI	-0.6895	1.065	No	ns
															C13 vs dcyto	-0.5679	---	No	ns
															C13 vs A13ea	-0.09907	---	No	ns
															A13ea vs A13	-8.083	12.49	Yes	***
		Set 2	GAPDH cT	PCNS cT	∆cT	∆∆cT	Power	Avg	Avg power treatment/Avg power NI	Avg	SD	SEM			A13ea vs nI	-0.5904	---	No	ns
			27.51	33.12	5.61	0.17	0.888843	0.635579	1.39848	1	0.358373	0.206907			A13ea vs dcyto	-0.4689	---	No	ns
			27.12	33.72	6.6	1.16	0.447513		0.704102						dcyto vs A13	-7.614	11.76	Yes	***
			27.08	33.33	6.25	0.81	0.570382		0.897421						dcyto vs nI	-0.1216	---	No	ns
			28.53	34.24	5.71	0.27	0.82932	0.860648	1.30483	1.35412	0.199234	0.115028			nI vs A13	-7.493	11.58	Yes	***
			28.3	34.15	5.85	0.41	0.752623		1.18415
			28.18	33.62	5.44	0	1		1.57337
			26.3	34.07	7.77	2.33	0.198884	0.18172	0.312918	0.285913	0.0233868	0.0135024
			26.32	34.29	7.97	2.53	0.173139		0.272411
			26.08	34.05	7.97	2.53	0.173139		0.272411
			26.06	34.43	8.37	2.93	0.131215	0.107722	0.206449	0.169487	0.033838	0.0195364
			25.82	34.75	8.93	3.49	0.0890031		0.140035
			25.76	34.48	8.72	3.28	0.102949		0.161977
			27.25	34.49	7.24	1.8	0.287175	0.242616	0.451831	0.381725	0.0705414	0.0407271
			26.85	34.63	7.78	2.34	0.19751		0.310757
			26.96	34.44	7.48	2.04	0.243164		0.382586
										dcyto vs A13	-1.185	10.97	Yes	***
			Non-Injected	ADAM 13	ADAM 13 E/A	Delta cyto	C13			dcyto vs nI	-0.8305	7.694	Yes	**
			1	1.35412	0.285913	0.169487	0.381725			dcyto vs C13	-0.2122	1.966	No	ns
			0.206907	0.115028	0.0135024	0.0195364	0.0407271			dcyto vs A13ea	-0.1164	---	No	ns
										A13ea vs A13	-1.068	9.895	Yes	***
										A13ea vs C13	-0.09581	---	No	ns
										C13 vs A13	-0.9724	9.008	Yes	***
										nI vs A13	-0.3541	3.28	Yes	*
			Set 3	GAPDH cT	PCNS cT	∆cT	∆∆cT	Power	Avg	Avg power treatment/Avg power NI	Avg	SD	SEM
			Non-Injected	24.95	31.75	6.8	2.74	0.149685	0.141106	1.0608	1	0.0563804	0.0325512
				24.77	31.67	6.9	2.84	0.139661		0.98976
				24.71	31.67	6.96	2.9	0.133972		0.949441
			C 13	26.84	32.15	5.31	1.25	0.420448	0.362367	2.97967	2.56805	0.356562	0.205861
				26.41	32.05	5.64	1.58	0.334482		2.37043
				26.28	31.93	5.65	1.59	0.332171		2.35406
			ADAM 13	27.19	31.85	4.66	0.6	0.659754	0.785709	4.6756	5.56822	1.32193	0.763219
				26.99	31.57	4.58	0.52	0.697372		4.94219
				26.96	31.02	4.06	0	1		7.08688
			Set 4	GAPDH cT	PCNS cT	∆cT	∆∆cT	Power	Avg	Avg power treatment/Avg power NI	Avg	SD	SEM
			Non-Injected	26.83	32.66	5.83	4.25	0.052556	0.0903461	0.581719	1	0.390541	0.225479
				26.71	31.67	4.96	3.38	0.0960547		1.06319
				26.51	31.12	4.61	3.03	0.122428		1.3551
			ADAM 13	28.25	30.31	2.06	0.48	0.716978	0.787718	7.9359	8.71889	2.07224	1.19641
				27.91	30.12	2.21	0.63	0.646176		7.15223
				27.71	29.29	1.58	0	1		11.0685
			ADAM 13 E/A	25.72	31.63	5.91	4.33	0.049721	0.0509128	0.55034	0.563531	0.0851109	0.0491388
				25.33	31.42	6.09	4.51	0.0438889		0.485786
				25.26	30.92	5.66	4.08	0.0591286		0.654468
			Delta cyto	25.45	30.47	5.02	3.44	0.0921418	0.0926062	1.01988	1.02502	0.0358765	0.0207133
				25.37	30.33	4.96	3.38	0.0960547		1.06319
				25.04	30.1	5.06	3.48	0.0896222		0.991988
			C13	24.88	31.18	6.3	4.72	0.0379436	0.0440682	0.41998	0.487771	0.0671044	0.0387427
				24.84	30.74	5.9	4.32	0.0500669		0.554168
				24	30.08	6.08	4.5	0.0441942		0.489165
			Set 5	GAPDH cT	PCNS cT	∆cT	∆∆cT	Power	Avg	Avg power treatment/Avg power NI	Avg	SD	SEM
			Non-Injected	26.81	39.67	12.86	3.57	0.0842021	0.237195	0.354991	1	0.632802	0.365348
				26.69	38.02	11.33	2.04	0.243164		1.02516
				26.45	37.12	10.67	1.38	0.384219		1.61984
			ADAM 13	28.72	38.01	9.29	0	1	0.8619	4.21594	3.63372	0.797881	0.460657
				28.55	37.93	9.38	0.09	0.939523		3.96097
				27.79	37.71	9.92	0.63	0.646176		2.72424
			ADAM 13 E/A	26.47	40.41	13.94	4.65	0.03983	0.152017	0.167921	0.640896	0.410161	0.236806
				26.31	37.83	11.52	2.23	0.213159		0.898665
				26.24	37.83	11.59	2.3	0.203063		0.856102
			Delta cyto	25.87	38.67	12.8	3.51	0.0877778	0.10249	0.370066	0.432091	0.118514	0.0684243
				25.73	38.58	12.85	3.56	0.0847878		0.35746
				25.4	37.58	12.18	2.89	0.134904		0.568746
			C13	27.02	38.35	11.33	2.04	0.243164	0.238746	1.02516	1.00654	0.0212428	0.0122646
				26.64	38.03	11.39	2.1	0.233258		0.983403
				26.56	37.91	11.35	2.06	0.239816		1.01105
		Set 6	GAPDH cT	PCNS cT	∆cT	∆∆cT	Power	Avg	expo	Avg	SD	SEM
			27.51	33.12	5.61	0	0.0204749	0.0146409	1.39848	1	0.358373	0.206907
			27.12	33.72	6.6	0.99	0.0103087		0.704102
			27.08	33.33	6.25	0.64	0.013139		0.897421
			28.53	34.24	5.71	0.1	0.0191038	0.0198254	1.30483	1.35412	0.199234	0.115028
			28.3	34.15	5.85	0.24	0.017337		1.18415
			28.18	33.62	5.44	-0.17	0.0230355		1.57337
			26.3	34.07	7.77	2.16	0.00458139	0.00418601	0.312918	0.285913	0.0233868	0.0135024
			26.32	34.29	7.97	2.36	0.00398833		0.272411
			26.08	34.05	7.97	2.36	0.00398833		0.272411
			26.06	34.43	8.37	2.76	0.00302259	0.00248143	0.206449	0.169487	0.033838	0.0195364
			25.82	34.75	8.93	3.32	0.00205023		0.140035
			25.76	34.48	8.72	3.11	0.00237147		0.161977
			27.25	34.49	7.24	1.63	0.0066152	0.00558878	0.451831	0.381725	0.0705414	0.0407271
			26.85	34.63	7.78	2.17	0.00454974		0.310757
			26.96	34.44	7.48	1.87	0.00560139		0.382586
