# Supplementary material for: Dual control of pcdh8l/PCNS expression and function in Xenopus laevis neural crest cells by adam13/33 via the transcription factors tfap2α and arid3a
Source: eLife journal article supplement (doi:10.7554/elife.26898), 2017-08-22
Supplement: supp [file elife_poa_e26898_Transparent_Reporting_File.docx]

***eLife’s* transparent reporting form**

We encourage authors to provide detailed information *within their submission* to facilitate the interpretation and replication of experiments. If you have any questions, please contact us: [editorial@elifesciences.org](mailto:editorial@elifesciences.org).

**Sample-size estimation**

- You should state whether an appropriate sample size was computed when the study was being designed
- You should state the statistical method of sample size computation and any required assumptions
- If no explicit power analysis was used, you should describe how you decided what sample (replicate) size (number) to use

Appropriate sample size was computed during study. One-way ANOVA (non-parametric) was performed using Newman–Keuls to determine statistical significance. Statistically significance at *p < 0.05, **p<0.01 and ***p < 0.005 mentioned in Materials and Methods section at page No 24. Outline information in page No. 33-39, figure legend 1-9.

For In-vivo embryo experiment more than 30 embryos and for animal cap experiments 10-15 animal caps per case in each set were used and experiment was repeated more than 3 times as mentioned in materials and method section page No. 33-39 and figure No 1-2, 4, 7.

For In-vitro experiment each experiment was performed in triplicate and repeated three times mentioned in materials and method section page No. 33-39.

Please outline where this information can be found within the submission (e.g., page numbers or figure legends), or explain why this information doesn’t apply to your submission:

**Replicates**

- You should report how often each experiment was performed
- You should include a definition of biological versus technical replication
- The data obtained should be provided and sufficient information should be provided to indicate the number of independent biological and/or technical replicates
- If you encountered any outliers, you should describe how these were handled
- Criteria for exclusion/inclusion of data should be clearly stated
- High-throughput sequence data should be uploaded before submission, with a private link for reviewers provided (these are available from both GEO and ArrayExpress)

For In-vivo embryo experiment more than 30 embryos and for animal cap experiments 10-15 animal caps per case in each set were used and experiment was repeated more than 3 times. Each time different female frog was used as biological replicate. Information about number of embryos was mentioned in figure No 1-2, 4, 7.

For In-vitro experiment each experiment was performed in triplicate and repeated three times. Different passage/subculture of 293T cells was used for its reproducibility of data mentioned in materials and method section page No. 33-39.

Any outlier was removed by analyzing its other parameters (marker, expression of gene, health of embryo etc.)

Please outline where this information can be found within the submission (e.g., page numbers or figure legends), or explain why this information doesn’t apply to your submission:

**Statistical reporting**

- Statistical analysis methods should be described and justified
- Raw data should be presented in figures whenever informative to do so (typically when N per group is less than 10)
- For each experiment, you should identify the statistical tests used, exact values of N, definitions of center, methods of multiple test correction, and dispersion and precision measures (e.g., mean, median, SD, SEM, confidence intervals; and, for the major substantive results, a measure of effect size (e.g., Pearson's r, Cohen's d)
- Report exact p-values wherever possible alongside the summary statistics and 95% confidence intervals. These should be reported for all key questions and not only when the p-value is less than 0.05.

Statistical analysis method was described in Material and Methods section page No. 35 and mentioned in each figure legends. Number of embryos mentioned in

Figure No 1-2, 4, 7.

Please outline where this information can be found within the submission (e.g., page numbers or figure legends), or explain why this information doesn’t apply to your submission:

(For large datasets, or papers with a very large number of statistical tests, you may upload a single table file with tests, Ns, etc., with reference to page numbers in the manuscript.)

**Additional data files (“source data”)**

- We encourage you to upload relevant additional data files, such as numerical data that are represented as a graph in a figure, or as a summary table
- Where provided, these should be in the most useful format, and they can be uploaded as “Source data” files linked to a main figure or table
- Include model definition files including the full list of parameters used
- Include code used for data analysis (e.g., R, MatLab)
- Avoid stating that data files are “available upon request”

Please indicate the figures or tables for which source data files have been provided:
